# Supplementary material
Source: PubMed Central journal article supplement (PMC2706521)
Supplement: NIHMS110679-supplement-1.pdf [file NIHMS110679-supplement-1.pdf]

**Table S1. Abundant bands identified by LC-MS/MS.**

For each protein details are given including the number of matching peptides, sequence coverage, the Mas

| <b>Pb number</b> | <b>Protein</b> | <b>MWt</b> | <b>pI</b> | <b>No. of peptides</b> | <b>Seq coverage</b> | <b>Mascot Score</b> |
|------------------|----------------|------------|-----------|------------------------|---------------------|---------------------|
| PB001032.02.0    | Chitinase      | 74408      | 5.09      | 71                     | 50%                 | 1219                |

|                    |       |      |    |     |     |
|--------------------|-------|------|----|-----|-----|
| PB000865.00.0 Pb28 | 24644 | 8.43 | 29 | 40% | 615 |
|--------------------|-------|------|----|-----|-----|

|                    |       |     |   |     |     |
|--------------------|-------|-----|---|-----|-----|
| PB001334.02.0 SOAP | 18884 | 8.7 | 8 | 25% | 294 |
|--------------------|-------|-----|---|-----|-----|

|                   |       |      |    |     |      |
|-------------------|-------|------|----|-----|------|
| PB001298.00.0 PDI | 49907 | 5.52 | 52 | 55% | 1389 |
|-------------------|-------|------|----|-----|------|

|                    |        |      |    |     |      |
|--------------------|--------|------|----|-----|------|
| PB000233.00.0 CTRP | 213160 | 4.85 | 75 | 29% | 1917 |
|--------------------|--------|------|----|-----|------|

PB001177.00.0 HSP70

72130

5.15

78

54%

1733



cot score and the individual peptide sequences, including the charge state and any modification.

| Peptide sequence                                   | Charge state |
|----------------------------------------------------|--------------|
| <u>K.GGTTINHPINISHTEK.Q</u>                        | 3            |
| <u>K.GGTTINHPINISHTEKQYK.S</u>                     | 3            |
| <u>K.SLSHVDALCGDSK.N</u>                           | 2            |
| <u>K.SLSHVDALCGDSKNFVCETK.Y</u>                    | 3            |
| <u>K.SLSHVDALCGDSKNFVCETK.Y</u>                    | 4            |
| <u>R.EILEEYK.K</u>                                 | 1            |
| <u>R.EILEEYKK.R</u>                                | 2            |
| <u>R.KQGIIAGYYGSWNSQGASGK.Q</u>                    | 3            |
| <u>K.QGIIAGYYGSWNSQGASGK.Q</u>                     | 2            |
| <u>K.QGIIAGYYGSWNSQGASGK.Q</u>                     | 3            |
| <u>K.QMTHSNPHVSIYIYAFAR.I</u>                      | 3            |
| <u>K.QMTHSNPHVSIYIYAFAR.I Oxidation (M)</u>        | 4            |
| <u>K.QMTHSNPHVSIYIYAFAR.I Oxidation (M)</u>        | 3            |
| <u>R.INMNYDASKPYNGLQK.F</u>                        | 3            |
| <u>R.INMNYDASKPYNGLQK.F</u>                        | 2            |
| <u>R.INMNYDASKPYNGLQK.F Oxidation (M)</u>          | 3            |
| <u>R.INMNYDASKPYNGLQK.F Oxidation (M)</u>          | 2            |
| <u>K.KHGLEFETYGMMANEIK.R 2 Oxidation (M)</u>       | 3            |
| <u>K.KHGLEFETYGMMANEIK.R 2 Oxidation (M)</u>       | 4            |
| <u>K.HGLEFETYGMMANEIK.R 2 Oxidation (M)</u>        | 3            |
| <u>K.HGLEFETYGMMANEIK.R 2 Oxidation (M)</u>        | 2            |
| <u>K.HGLEFETYGMMANEIKR.I 2 Oxidation (M)</u>       | 4            |
| <u>K.HGLEFETYGMMANEIKR.I 2 Oxidation (M)</u>       | 3            |
| <u>K.LIDLIR.S</u>                                  | 1            |
| <u>K.DEETPYNTQYLSEQMIVNPELYK.A Oxidation (M)</u>   | 3            |
| <u>K.ASTMLSTGTFVNVFNTAK.D</u>                      | 2            |
| <u>K.ASTMLSTGTFVNVFNTAK.D Oxidation (M)</u>        | 2            |
| <u>K.ASTMLSTGTFVNVFNTAK.D Oxidation (M)</u>        | 3            |
| <u>K.ASTMLSTGTFVNVFNTAKDK.I Oxidation (M)</u>      | 3            |
| <u>K.KYDITVFLGFSIEQNR.G</u>                        | 4            |
| <u>R.GGFSPDSKNLVELVSK.A</u>                        | 3            |
| <u>K.NLVELVSK.A</u>                                | 2            |
| <u>K.NLVELVSK.A</u>                                | 1            |
| <u>K.EQMPNGAYDLDFIDNTWTHLNPGIK.S Oxidation (M)</u> | 3            |
| <u>K.HNDAIWVTR.S</u>                               | 2            |
| <u>R.APGIDRYEWNLVK.V</u>                           | 2            |
| <u>R.APGIDRYEWNLVK.V</u>                           | 3            |
| <u>R.YEWNLVK.V</u>                                 | 2            |
| <u>K.VCYEKACNNEAAHYYNVDYPTGTK.I</u>                | 4            |
| <u>K.ACNEAAHYYNVDYPTGTK.I</u>                      | 3            |

|                                                  |   |
|--------------------------------------------------|---|
| <u>K.ACNEAAHYYNVDYPTGTK.I</u>                    | 2 |
| <u>K.IIWKGEVFSIK.Q</u>                           | 3 |
| <u>K.IIWKGEVFSIK.Q</u>                           | 2 |
| <u>K.QWHGGPPEGPYLESYEK.L</u>                     | 3 |
| <u>K.QWHGGPPEGPYLESYEK.L</u>                     | 2 |
| <u>K.LDEYSCPLAEWNIK.H</u>                        | 3 |
| <u>K.LDEYSCPLAEWNIK.H</u>                        | 2 |
| <u>K.HPHKPIEVEAPYEQELDG.-</u>                    | 2 |
| <u>K.HPHKPIEVEAPYEQELDG.-</u>                    | 3 |
| <u>K.HPHKPIEVEAPYEQELDG.-</u>                    | 4 |
| <br>                                             |   |
| <u>K.ITVDTICK.G</u>                              | 2 |
| <u>K.LIQMSNHYECK.C</u>                           | 2 |
| <u>K.LIQMSNHYECK.C</u>                           | 3 |
| <u>K.LIQMSNHYECK.C Oxidation (M)</u>             | 2 |
| <u>K.LIQMSNHYECK.C Oxidation (M)</u>             | 3 |
| <u>K.LIQMSNHYECKCPSGYALK.T Oxidation (M)</u>     | 4 |
| <u>K.LIQMSNHYECKCPSGYALK.T Oxidation (M)</u>     | 3 |
| <u>K.CPSGYALK.T</u>                              | 2 |
| <u>K.CPSGYALKTENTCEPIVK.C</u>                    | 3 |
| <u>K.TENTCEPIVK.C</u>                            | 2 |
| <u>K.AFVCMCTNGYMLSQNICKPTR.C 2 Oxidation (M)</u> | 3 |
| <u>R.CYNYECNAGK.C</u>                            | 2 |
| <u>K.CILDSINPNNPVCSDIGK.I</u>                    | 2 |
| <u>K.CILDSINPNNPVCSDIGK.I</u>                    | 3 |
| <br>                                             |   |
| <u>K.GYKYLDSNSSNPLADV.K.A</u>                    | 3 |
| <u>K.YLDSNSSNPLADV.K.A</u>                       | 2 |
| <u>K.YLDSNSSNPLADV.KASSR.S</u>                   | 3 |
| <u>K.SATKSDNNDIDNGPVECFSSCK.S</u>                | 3 |
| <br>                                             |   |
| <u>R.LIPEYNEAAIMLSEK.K</u>                       | 2 |
| <u>R.LIPEYNEAAIMLSEK.K Oxidation (M)</u>         | 2 |
| <u>R.LIPEYNEAAIMLSEK.K.S Oxidation (M)</u>       | 3 |
| <u>K.LASVDATVER.G</u>                            | 2 |
| <u>R.GLSQEYGITGYPTMILFNK.K Oxidation (M)</u>     | 2 |
| <u>R.GLSQEYGITGYPTMILFNK.K.N Oxidation (M)</u>   | 3 |
| <u>K.FNEVGDKNR.E</u>                             | 2 |
| <u>K.TPLNDFVAIESFPLFGEINTENYR.F</u>              | 2 |
| <u>K.TPLNDFVAIESFPLFGEINTENYR.F</u>              | 3 |
| <u>R.NKTHFVLLNIPEYADHAK.A</u>                    | 4 |
| <u>K.ASLGINEFPGLAYQSSEGR.Y</u>                   | 2 |
| <u>R.YLLANPQQSLK.N</u>                           | 2 |
| <u>K.DIISFFK.D</u>                               | 2 |
| <u>K.DIISFFK.D</u>                               | 1 |

|                                        |   |
|----------------------------------------|---|
| <u>K.SEPIPEEDKNAAVK.V</u>              | 2 |
| <u>K.SEPIPEEDKNAAVK.V</u>              | 3 |
| <u>K.VVVGNSFTDVVLNSGK.D</u>            | 2 |
| <u>K.KLEPIYEELGR.K</u>                 | 3 |
| <u>K.KLEPIYEELGR.K</u>                 | 2 |
| <u>K.KYDHIIIVAK.M</u>                  | 2 |
| <u>K.MDGTLNETSLK.E</u>                 | 2 |
| <u>K.MDGTLNETSLK.E Oxidation (M)</u>   | 2 |
| <u>K.AGSKIPLPYEGER.T</u>               | 3 |
| <u>K.AGSKIPLPYEGER.T</u>               | 2 |
| <u>K.GFVDFLNK.H</u>                    | 2 |
| <u>K.GFVDFLNK.H</u>                    | 1 |
| <u>K.HSTKTPITIDVVSQSYEGSSEEL.-</u>     | 3 |
| <u>K.TPITIDVVSQSYEGSSEEL.-</u>         | 2 |
| <br>                                   |   |
| <u>K.SNWVEYVVPFTEQIVK.G</u>            | 2 |
| <u>K.IGENDIHVGILLFALR.N</u>            | 2 |
| <u>R.NRDYITFDNDIR.Y</u>                | 3 |
| <u>R.NRDYITFDNDIR.Y</u>                | 2 |
| <u>R.DYITFDNDIR.Y</u>                  | 2 |
| <u>K.VNDLNDDYR.A</u>                   | 2 |
| <u>R.AGGDYILEALK.Y</u>                 | 2 |
| <u>R.AGGDYILEALKYSLK.K</u>             | 3 |
| <u>K.VTILFTDGNDIHASK.S</u>             | 3 |
| <u>K.VTILFTDGNDIHASKSEFHK.M</u>        | 4 |
| <u>K.LLVLGVSAAEESK.L</u>               | 2 |
| <u>K.AEWETINNITNK.L</u>                | 2 |
| <u>K.KDVIPFSEK.L</u>                   | 2 |
| <u>K.DVIPFSEK.L</u>                    | 2 |
| <u>K.LINNLNISK.D</u>                   | 2 |
| <u>K.LINNLNISKDK.V</u>                 | 2 |
| <u>R.FSKEVITDVDYSQDTR.Y</u>            | 3 |
| <u>R.FSKEVITDVDYSQDTR.Y</u>            | 2 |
| <u>K.EVITDVDYSQDTR.Y</u>               | 2 |
| <u>R.YIKNDLISVVK.G</u>                 | 2 |
| <u>R.YIKNDLISVVK.G</u>                 | 3 |
| <u>K.NDLISVVK.G</u>                    | 2 |
| <u>R.TNIVDALDYSLK.N</u>                | 2 |
| <u>K.VTILFTDGNDTSK.T</u>               | 2 |
| <u>K.VTILFTDGNDTSKTLAEER.N</u>         | 3 |
| <u>K.TLAEERNMGILYR.H Oxidation (M)</u> | 3 |
| <u>K.WNELTGITTIITDK.I</u>              | 2 |
| <u>R.WTMEVIPFAK.D Oxidation (M)</u>    | 2 |
| <u>K.TNYGNGHESFIVK.T</u>               | 2 |
| <u>K.TNYGNGHESFIVK.T</u>               | 3 |



|                                                          |   |
|----------------------------------------------------------|---|
| <u>K.YALSNYTK.G</u>                                      | 2 |
| <u>K.ITMLFTDGNDSSESDIDMYNIGSLYR.T 2 Oxidation (M)</u>    | 3 |
| <u>K.ITMLFTDGNDSSESDIDMYNIGSLYRTER.V Oxidation (M)</u>   | 4 |
| <u>K.ITMLFTDGNDSSESDIDMYNIGSLYRTER.V 2 Oxidation (M)</u> | 3 |
| <u>K.LLVIGVSMASENK.L Oxidation (M)</u>                   | 2 |
| <u>K.LLVIGVSMASENKLK.Q Oxidation (M)</u>                 | 3 |
| <u>K.LLVIGVSMASENKLK.Q Oxidation (M)</u>                 | 2 |
| <u>K.QLVGCAQNLPCPFVIK.T</u>                              | 2 |
| <u>K.QVYPFTEK.F</u>                                      | 2 |
| <u>K.SGGYTYIIEALNYGLANYTHHEASR.S</u>                     | 4 |
| <u>K.SGGYTYIIEALNYGLANYTHHEASR.S</u>                     | 3 |
| <u>K.VTMLFTDGNNTNPGDK.L Oxidation (M)</u>                | 2 |
| <u>K.VTMLFTDGNNTNPGDK.L Oxidation (M)</u>                | 3 |
| <u>K.LLSDVSLLYK.Q</u>                                    | 2 |
| <u>K.LLVVGVGASTMANLR.L Oxidation (M)</u>                 | 2 |
| <u>R.LLAGCHKTDGNCPLATK.T</u>                             | 4 |
| <u>R.LLAGCHKTDGNCPLATK.T</u>                             | 3 |
| <u>K.TDGNCPLATKTEWDNLQDISK.L</u>                         | 3 |
| <u>K.TEWDNLQDISK.L</u>                                   | 2 |
| <u>K.NIINMFNIGKK.N Oxidation (M)</u>                     | 3 |
| <u>K.SINRDFDDAIAYDR.T</u>                                | 3 |
| <u>K.SINRDFDDAIAYDR.T</u>                                | 2 |
| <u>R.DFDDAIAYDR.T</u>                                    | 2 |
| <u>R.VLDQMDNYFSEDK.T Oxidation (M)</u>                   | 2 |
| <u>K.IALLLTDSNNDTYEK.S</u>                               | 2 |
| <u>R.GKEQWSLYR.K</u>                                     | 2 |
| <u>K.IDKLQMSYSNIINLADNLK.Y Oxidation (M)</u>             | 3 |
| <u>K.LQMSYSNIINLADNLK.Y Oxidation (M)</u>                | 2 |
| <u>K.LIIMLVEGK.S Oxidation (M)</u>                       | 2 |
| <u>K.VSWENLLSSVEIHNK.F</u>                               | 2 |
| <u>K.VSWENLLSSVEIHNK.F</u>                               | 3 |
| <u>R.NVSPDNEMCQTFNK.T Oxidation (M)</u>                  | 2 |
| <u>K.IETEVCSVPK.C</u>                                    | 2 |
| <u>K.NPKTDTSQACNDYSLFR.E</u>                             | 2 |
| <u>K.TDTSQACNDYSLFR.E</u>                                | 2 |
| <br>                                                     |   |
| <u>K.NGRVEILNNDLGNR.I</u>                                | 3 |
| <u>K.NGRVEILNNDLGNR.I</u>                                | 2 |
| <u>R.VEILNNDLGNR.I</u>                                   | 2 |
| <u>R.ITPSYVSFVDGER.K</u>                                 | 2 |
| <u>R.ITPSYVSFVDGERK.V</u>                                | 3 |
| <u>R.ITPSYVSFVDGERK.V</u>                                | 2 |
| <u>K.LEATLHPTQTVFDVKR.R</u>                              | 3 |
| <u>K.LEATLHPTQTVFDVKR.L</u>                              | 3 |
| <u>K.LEATLHPTQTVFDVKR.L</u>                              | 4 |

|                                                 |   |
|-------------------------------------------------|---|
| <u>R.TLLPYEIVNNEGKPNIR.V</u>                    | 3 |
| <u>R.VQIKDKPTTFAPEQISAMVLEK.M Oxidation (M)</u> | 4 |
| <u>R.VQIKDKPTTFAPEQISAMVLEK.M Oxidation (M)</u> | 3 |
| <u>K.DKPTTFAPEQISAMVLEK.M Oxidation (M)</u>     | 3 |
| <u>K.DKPTTFAPEQISAMVLEK.M Oxidation (M)</u>     | 2 |
| <u>K.DKPTTFAPEQISAMVLEKMK.E 2 Oxidation (M)</u> | 4 |
| <u>K.MKEIAQSFLGKPVK.N Oxidation (M)</u>         | 2 |
| <u>K.MKEIAQSFLGKPVK.N Oxidation (M)</u>         | 3 |
| <u>K.EIAQSFLGKPVK.N</u>                         | 3 |
| <u>K.EIAQSFLGKPVK.N</u>                         | 2 |
| <u>K.NAVVTVPAYFNDAQR.Q</u>                      | 3 |
| <u>K.NAVVTVPAYFNDAQR.Q</u>                      | 2 |
| <u>R.QATKDAGAIAGLNIVR.I</u>                     | 3 |
| <u>R.QATKDAGAIAGLNIVR.I</u>                     | 2 |
| <u>K.DAGAIAGLNIVR.I</u>                         | 2 |
| <u>R.IINEPTAAALAYGLDK.K</u>                     | 2 |
| <u>R.IINEPTAAALAYGLDK.K</u>                     | 3 |
| <u>R.IINEPTAAALAYGLDKK.E</u>                    | 3 |
| <u>R.IINEPTAAALAYGLDKK.E</u>                    | 2 |
| <u>R.VMDYFIK.M</u>                              | 2 |
| <u>R.VMDYFIK.M Oxidation (M)</u>                | 2 |
| <u>K.FEELNDDLFR.E</u>                           | 2 |
| <u>K.VLDDAKYEK.S</u>                            | 2 |
| <u>K.SKIDEIVLVGGSTR.I</u>                       | 3 |
| <u>K.SKIDEIVLVGGSTR.I</u>                       | 2 |
| <u>K.IDEIVLVGGSTR.I</u>                         | 2 |
| <u>K.IDEIVLVGGSTRIPK.I</u>                      | 3 |
| <u>K.DFFNGKEPNR.G</u>                           | 3 |
| <u>K.DFFNGKEPNR.G</u>                           | 2 |
| <u>K.SQTFSTYQDNQPAVLIQVFEGER.A</u>              | 3 |
| <u>R.ALTKDNHLLGK.F</u>                          | 3 |
| <u>K.FELSGIPPAQR.G</u>                          | 2 |
| <u>K.NGILHVEAEDKGTGK.S</u>                      | 3 |
| <u>K.MINDAEKFADEDK.N Oxidation (M)</u>          | 3 |
| <u>K.VESKNNLDNYIQSMK.A Oxidation (M)</u>        | 3 |
| <u>K.NNLDNYIQSMK.A</u>                          | 2 |
| <u>K.NNLDNYIQSMK.A Oxidation (M)</u>            | 2 |
| <u>K.EDKDTILNTIK.E</u>                          | 3 |
| <u>K.EDKDTILNTIK.E</u>                          | 2 |
| <u>K.EAEDWLNNSNADSEALK.Q</u>                    | 2 |
| <u>K.EAEDWLNNSNADSEALKQK.L</u>                  | 3 |
| <u>K.LKEVEAICQPIIVK.L</u>                       | 3 |
| <u>K.LKEVEAICQPIIVK.L</u>                       | 2 |
| <u>K.EVEAICQPIIVK.L</u>                         | 2 |
| <u>K.LYGQPGANTPPPGDEDVDSDEL.-</u>               | 2 |



Type of file: table

Label: suptable2

Filename: sm003.xls

| <b>Table S2 Proteins detected in the microneme enriched fraction by MudPIT shotgun proteomics</b>                                                                                                                                                                                                                                                                                                                                       |                  |                                                |
|-----------------------------------------------------------------------------------------------------------------------------------------------------------------------------------------------------------------------------------------------------------------------------------------------------------------------------------------------------------------------------------------------------------------------------------------|------------------|------------------------------------------------|
| <p>The <i>Plasmodium berghei</i> (Pb) number identifier of the protein detected is indicated with the Plasmodium assigned a MIPs functional classification and the associated number of peptides, spectra and sequence coverage. The predicted subcellular localization of the proteins are shown: Sec (secretory pathway), Api (apicoplast), ER (ER resident), Mito (mitochondrial), N (nucleus). MIPs predictions are also shown.</p> |                  |                                                |
| <b>Pb number</b>                                                                                                                                                                                                                                                                                                                                                                                                                        | <b>Pf number</b> | <b>Description</b>                             |
| PB001032.02.0                                                                                                                                                                                                                                                                                                                                                                                                                           | PFL2510w         | chitinase                                      |
| PB001334.02.0                                                                                                                                                                                                                                                                                                                                                                                                                           | PF14_0040        | SOAP                                           |
| PB000233.00.0                                                                                                                                                                                                                                                                                                                                                                                                                           | PFC0640w         | CTRP                                           |
| PB000247.02.0                                                                                                                                                                                                                                                                                                                                                                                                                           | PFL0800c         | CelTOS                                         |
| PB000020.03.0                                                                                                                                                                                                                                                                                                                                                                                                                           | PF08_0136b       | WARP                                           |
| PB000843.02.0                                                                                                                                                                                                                                                                                                                                                                                                                           | MAL13P1.56       | m1-family aminopeptidase                       |
| PB001298.00.0                                                                                                                                                                                                                                                                                                                                                                                                                           | MAL8P1.17        | protein disulfide isomerase                    |
| PB000100.01.0                                                                                                                                                                                                                                                                                                                                                                                                                           | PF08_0050        | PPLP4                                          |
| PB000676.00.0                                                                                                                                                                                                                                                                                                                                                                                                                           | PF14_0553        | Falcpain-1*                                    |
| PB000757.02.0                                                                                                                                                                                                                                                                                                                                                                                                                           | PF14_0425        | Fructose-bisphosphate aldolase                 |
| PB000865.00.0                                                                                                                                                                                                                                                                                                                                                                                                                           | PF10_0302        | P28                                            |
| PB000266.01.0                                                                                                                                                                                                                                                                                                                                                                                                                           | PF10_0303        | P25                                            |
| PB000977.02.0                                                                                                                                                                                                                                                                                                                                                                                                                           | PF14_0067        | LAP1                                           |
| PB001526.02.0                                                                                                                                                                                                                                                                                                                                                                                                                           | PF13_0248        | pf47*                                          |
| PB000400.01.0                                                                                                                                                                                                                                                                                                                                                                                                                           | PFE0395c         | Pf38*                                          |
| PB000800.03.0                                                                                                                                                                                                                                                                                                                                                                                                                           | MAL7P1.12        | erythrocyte membrane-associated antigen        |
| PB105376.00.0                                                                                                                                                                                                                                                                                                                                                                                                                           |                  | integral membrane protein                      |
| PB001411.02.0                                                                                                                                                                                                                                                                                                                                                                                                                           | PFL0620c         | choline transporter*                           |
| PB000079.01.0                                                                                                                                                                                                                                                                                                                                                                                                                           | MAL13P1.63       | Asparagine-rich protein                        |
| PB001178.00.0                                                                                                                                                                                                                                                                                                                                                                                                                           | PFI0880c         | acid phosphatase                               |
| PB000652.01.0                                                                                                                                                                                                                                                                                                                                                                                                                           | PF14_0723        | LAP2                                           |
| PB000504.02.0                                                                                                                                                                                                                                                                                                                                                                                                                           | PF14_0532        | LAP4                                           |
| PB106570.00.0                                                                                                                                                                                                                                                                                                                                                                                                                           | PF10_0323        | etramp10.2*                                    |
| PB001124.02.0                                                                                                                                                                                                                                                                                                                                                                                                                           | PFC0975c         | cyclophilin                                    |
| PB001172.01.0                                                                                                                                                                                                                                                                                                                                                                                                                           | PFA0445w         | LAP3                                           |
| PB001116.03.0                                                                                                                                                                                                                                                                                                                                                                                                                           | PFL1880w         | long-chain-fatty-acid--CoA ligase              |
| PB001011.01.0                                                                                                                                                                                                                                                                                                                                                                                                                           | PFL1530w         | asparagine-rich protein*                       |
| PB001146.01.0                                                                                                                                                                                                                                                                                                                                                                                                                           | PF10_0075        | Asparagine-rich antigen                        |
| PB001166.02.0                                                                                                                                                                                                                                                                                                                                                                                                                           | PFF1035w         | Pfs77 protein*                                 |
| PB001108.00.0                                                                                                                                                                                                                                                                                                                                                                                                                           | PF10_0361        | Pfemp3-like protein*                           |
| PB000924.03.0                                                                                                                                                                                                                                                                                                                                                                                                                           | PF10_0115        | QF122 antigen                                  |
| PB000861.02.0                                                                                                                                                                                                                                                                                                                                                                                                                           | PF13_0119        | Rab11a                                         |
| PB300822.00.0                                                                                                                                                                                                                                                                                                                                                                                                                           | PFI0155c         | Rab7                                           |
| PB001163.00.0                                                                                                                                                                                                                                                                                                                                                                                                                           | PF14_0377        | vesicle-associated membrane protein (VAMP)     |
| PB000711.03.0                                                                                                                                                                                                                                                                                                                                                                                                                           | PF11_0052        | Syn13*                                         |
| PB001003.01.0                                                                                                                                                                                                                                                                                                                                                                                                                           | PF11_0098        | calumenin                                      |
| PB000994.03.0                                                                                                                                                                                                                                                                                                                                                                                                                           | PFB0450w         | SEC61 gamma subunit                            |
| PB000782.00.0                                                                                                                                                                                                                                                                                                                                                                                                                           | PF08_0113        | vacuolar proton-translocating ATPase subunit A |
| PB000723.02.0                                                                                                                                                                                                                                                                                                                                                                                                                           | PF14_0361        | sec62*                                         |
| PB001230.00.0                                                                                                                                                                                                                                                                                                                                                                                                                           | PFE1195w         | Ran binding protein 5                          |
| PB001083.00.0                                                                                                                                                                                                                                                                                                                                                                                                                           | PF14_0493        | sortilin*                                      |
| PB000167.01.0                                                                                                                                                                                                                                                                                                                                                                                                                           | PFE0625w         | Rab1                                           |
| PB001177.00.0                                                                                                                                                                                                                                                                                                                                                                                                                           | PFI0875w         | Bip                                            |
| PB001126.00.0                                                                                                                                                                                                                                                                                                                                                                                                                           | PFL0930w         | clathrin heavy chain*                          |
| AAF27978.1                                                                                                                                                                                                                                                                                                                                                                                                                              | PF11_0461        | Rab6                                           |
| PB105885.00.0                                                                                                                                                                                                                                                                                                                                                                                                                           | MAL8P1.104       | coronin binding protein                        |

|               |             |                                                  |
|---------------|-------------|--------------------------------------------------|
| PB001185.00.0 | PFC0190c    | EH-domain containing protein                     |
| PB001133.02.0 | PFI1670c    | vacuolar ATP synthase subunit E*                 |
| PB000844.02.0 | PF13_0065   | vacuolar ATP synthase catalytic subunit a        |
| PB000642.03.0 | PF13_0130   | vacuolar ATP synthase subunit g                  |
| PB000507.01.0 | PFC0140c    | N-ethylmaleimide-sensitive fusion protein        |
| PB000267.00.0 | PFD0810w    | sar1                                             |
| PB000857.01.0 | PF11_0183   | Ran/TC4                                          |
| PB000159.03.0 | PF11_0465   | dynammin-like protein                            |
| PB000600.00.0 | PF07_0072   | CDPK4                                            |
| PB000158.03.0 | PFB0815w    | CDPK1*                                           |
| PB000926.02.0 | PFL1845c    | calyculin binding protein                        |
| PB000675.00.0 | PFA0310c    | calcium-transporting ATPase                      |
| PB000562.01.0 | PFB0210c    | monosaccharide transporter*                      |
| PB000394.02.0 | PFL0590c    | p-type ATPase                                    |
| PB001115.00.0 | PF10_0130   | nicalin*                                         |
| PB000910.02.0 | PF14_0421   | lysophosphatidic acid acyltransferase            |
| PB000900.00.0 | MAL8P1.69   | 14-3-3 protein                                   |
| PB000878.03.0 | PFL1110c    | cAMP-dependent protein kinase regulatory subunit |
| PB000242.02.0 | PF08_0019   | RACK                                             |
| PB001069.00.0 | PF13_0233   | myosin A                                         |
| PB000857.00.0 | PFD1050w    | alpha tubulin                                    |
| PB000164.02.0 | PF10_0084   | beta-tubulin                                     |
| PB000323.01.0 | PFL2215w    | actin                                            |
| PB000193.03.0 | PFL2225w    | MTIP                                             |
| PB000803.00.0 | PFE0165w    | actin depolymerizing factor                      |
| PB000096.01.0 | PF10_0039   | IMC1                                             |
| PB000314.00.0 | PFL1030w    | IMC3                                             |
| PB300823.00.0 | PF07_0029   | heat shock protein 86                            |
| PB300387.00.0 | PF11_0380   | DnaJ*                                            |
| PB001037.03.0 | PF11_0331   | t-complex protein 1, alpha subunit               |
| PB000731.00.0 | PFI0935w    | DNAJ-like molecular chaperone protein*           |
| PB000443.01.0 | PF13_0102   | Sec63 homologue                                  |
| PB000053.00.0 | PFL1070c    | HSP90                                            |
| PB300768.00.0 | PF11_0099   | DnaJ                                             |
| PB000872.00.0 | PF08_0063   | ClpB                                             |
| PB000330.03.0 | PF11_0352   | protein disulfide isomerase related protein      |
| PB001598.02.0 | PFL1545c    | cpn60                                            |
| PB001190.00.0 | PF11_0175   | clpB*                                            |
| PB001516.02.0 | PFF1415c    | DNAJ domain protein                              |
| PB001532.02.0 | PF07_0029   | heat shock protein 81-2                          |
| PB001074.01.0 | PF11_0351   | hsp70                                            |
| PB001185.02.0 | PFB0595w    | heat shock 40 kDa protein                        |
| PB001040.00.0 | PF14_0359   | DnaJ-like protein                                |
| PB000879.01.0 | PF10_0153   | hsp60                                            |
| PB000876.00.0 | MAL8P1.78   | small heat shock protein                         |
| PB000831.01.0 | PFC0350c    | T-complex protein eta subunit                    |
| PB000817.02.0 | PF08_0054   | heat shock 70 kDa protein                        |
| PB000733.01.0 | PFL0740c    | 10 kd chaperonin                                 |
| PB000354.02.0 | PFC0285c    | T-complex protein beta subunit                   |
| PB000935.01.0 | PF14_0700   | DnaJ homologue*                                  |
| PB000738.02.0 | PF13_0322   | falcilysin                                       |
| PB000628.00.0 | PF14_0517   | peptidase                                        |
| PB000298.03.0 | PF14_0075   | plasmepsin                                       |
| PB300700.00.0 | PF10_0334   | flavoprotein subunit of succinate dehydrogenase  |
| PB001222.02.0 | MAL13P1.221 | aspartate carbamoyltransferase*                  |
| PB001022.02.0 | PFC0275w    | FAD-dependent glycerol-3-phosphate dehydrogenase |

|               |           |                                                          |
|---------------|-----------|----------------------------------------------------------|
| PB000966.02.0 | PFL1550w  | lipoamide dehydrogenase                                  |
| PB000860.02.0 | PF13_0121 | dihydrolipoamide succinyltransferase                     |
| PB000370.02.0 | PF08_0031 | oxoglutarate/malate translocator protein*                |
| PB000262.01.0 | PF13_0272 | thioredoxin-related protein                              |
| PB000185.00.0 | PF13_0141 | L-lactate dehydrogenase                                  |
| PB000037.01.0 | PF14_0368 | 2-Cys peroxiredoxin                                      |
| PB001317.02.0 | PF14_0192 | glutathione reductase                                    |
| PB000187.03.0 | PFE1250w  | long-chain fatty acid CoA ligase                         |
| PB000291.00.0 | PF13_0044 | carbamoyl phosphate synthetase II                        |
| PB000968.02.0 | PFL1555w  | cytochrome b5                                            |
| PB000281.02.0 | PF14_0295 | ATP-specific succinyl-CoA synthetase beta subunit        |
| PB000856.03.0 | PF11_0174 | cathepsin c                                              |
| PB001143.00.0 | PFI0695c  | Phospholipid or glycerol acyltransferase*                |
| PB000989.01.0 | PFE1150w  | multidrug resistance protein                             |
| PB000874.03.0 | PF14_0334 | NAD(P)H-dependent glutamate synthase                     |
| PB001294.02.0 | PF08_0108 | pepsinogen                                               |
| PB300802.00.0 | PF14_0615 | ATP synthase (C/AC39) subunit                            |
| PB300223.00.0 | PF14_0598 | glyceraldehyde 3-phosphate dehydrogenase*                |
| PB001331.02.0 | PF14_0038 | cytochrome c                                             |
| PB000894.02.0 | PFL1720w  | Serine hydroxymethyltransferase                          |
| PB000613.00.0 | PFF0825c  | mitochondrial import receptor subunit tom40              |
| PB000521.02.0 | PFF1300w  | pyruvate kinase                                          |
| PB000456.03.0 | PF10_0155 | enolase                                                  |
| PB000318.00.0 | PFI1105w  | Phosphoglycerate kinase                                  |
| PB000084.03.0 | PF14_0598 | glyceraldehyde-3-phosphate dehydrogenase                 |
| PB001437.02.0 | PF10_0086 | adenylate kinase                                         |
| PB000896.02.0 | PFL1725w  | ATP synthase F1                                          |
| PB001062.02.0 | PF13_0070 | branched-chain alpha keto-acid dehydrogenase             |
| PB000990.01.0 | PFE1155c  | mitochondrial processing peptidase alpha subunit         |
| PB000917.03.0 | PF13_0242 | isocitrate dehydrogenase (NADP), mitochondrial precursor |
| PB000824.00.0 | PFB0795w  | ATP synthase F1, alpha subunit                           |
| PB000183.00.0 | PF13_0143 | phosphoribosylpyrophosphate synthetase                   |
| PB000404.03.0 | PF07_0047 | Putative cell division cycle ATPase*                     |
| PB300214.00.0 | PFB0895c  | replication factor C*                                    |
| PB300144.00.0 | PFF0860c  | histone h2a                                              |
| PB000171.02.0 | PFF0940c  | cell division cycle protein 48                           |
| PB000338.02.0 | PF14_0443 | centrin                                                  |
| PB001391.02.0 | PFA0345w  | centrin*                                                 |
| PB001306.02.0 | PF07_0054 | histone h2b                                              |
| PB001096.02.0 | PFC0920w  | histone H2A variant                                      |
| PB000394.00.0 | PF11_0250 | high mobility group-like protein NHP2                    |
| PB000303.02.0 | PFL0185c  | nucleosome assembly protein 1                            |
| PB000272.03.0 | PFB0445c  | helicase                                                 |
| PB001284.02.0 | PFI0930c  | nucleosome assembly protein                              |
| PB001601.02.0 | MAL8P1.72 | high mobility group protein                              |
| PB000593.03.0 | PFD0685c  | chromosome-associated polypeptide                        |
| PB001018.00.0 | PFF0510w  | histone 3*                                               |
| PB300781.00.0 | PF11_0062 | histone H2B                                              |
| PB001051.00.0 | PF11_0062 | histone H2B                                              |
| PB000540.03.0 | PFL0145c  | high mobility group protein*                             |
| PB001573.02.0 | PFB0260w  | proteasome 26S regulatory subunit                        |
| PB001114.01.0 | PFI1085w  | ubiquitin-like protein                                   |
| PB000751.01.0 | PF14_0632 | 26S proteasome subunit                                   |
| PB001067.01.0 | PF14_0477 | signal recognition particle 54 kDa protein               |
| PB000982.00.0 | PF11_0164 | peptidyl-prolyl cis-trans isomerase                      |
| PB000763.03.0 | PFL0585w  | Ubiquitin-like protein                                   |

|               |             |                                       |
|---------------|-------------|---------------------------------------|
| PB000601.02.0 | PF10_0081   | 26S proteasome subunit 4-like protein |
| PB001133.00.0 | PF13_0063   | 26S proteasome regulatory subunit 7   |
| PB300974.00.0 | PFL2405c    | hypothetical protein                  |
| PB300837.00.0 | PF11_0384   | hypothetical protein*                 |
| PB000031.02.0 | PF14_0593   | hypothetical protein*                 |
| PB000883.00.0 | MAL13P1.540 | hypothetical protein                  |
| PB300696.00.0 | MAL13P1.342 | hypothetical protein*                 |
| PB108442.00.0 | MAL13P1.308 | hypothetical protein                  |
| PB106275.00.0 |             | hypothetical protein                  |
| PB105866.00.0 |             | hypothetical protein                  |
| PB105143.00.0 | PF10_0257   | hypothetical protein                  |
| PB102173.00.0 |             | hypothetical protein                  |
| PB000915.00.0 | PFA0430c    | hypothetical protein                  |
| PB001012.01.0 | PF14_0616   | hypothetical protein                  |
| PB000701.00.0 | PFA0195w    | hypothetical protein                  |
| PB001102.00.0 | PF13_0355   | hypothetical protein                  |
| PB000110.02.0 | PFI1270w    | hypothetical protein                  |
| PB402680.00.0 | MAL8P1.66   | hypothetical protein                  |
| PB000129.01.0 | PF08_0008   | hypothetical protein                  |
| PB001346.02.0 | PFC0730w    | hypothetical protein*                 |
| PB001294.00.0 | PFL1685w    | hypothetical protein                  |
| PB001258.02.0 | MAL13P1.288 | hypothetical protein*                 |
| PB001130.02.0 | PFB0760w    | hypothetical protein*                 |
| PB001081.01.0 | PF11_0246   | hypothetical protein                  |
| PB000878.02.0 | PF10_0063   | hypothetical protein                  |
| PB000851.02.0 | PFA0490w    | hypothetical protein*                 |
| PB000842.01.0 | MAL13P1.121 | hypothetical protein*                 |
| PB000730.02.0 | PF14_0344   | hypothetical protein                  |
| PB000722.00.0 | MAL8P1.73   | hypothetical protein*                 |
| PB000693.03.0 | PFE0785c    | hypothetical protein*                 |
| PB000658.00.0 | PF14_0467   | hypothetical protein*                 |
| PB000637.00.0 | PF14_0350   | hypothetical protein*                 |
| PB000607.00.0 | PF08_0032   | hypothetical protein*                 |
| PB000505.01.0 | PFD0355c    | hypothetical protein*                 |
| PB000489.03.0 | PFF0835w    | hypothetical protein                  |
| PB000440.03.0 | PF13_0196   | hypothetical protein*                 |
| PB000309.01.0 | PF07_0087   | hypothetical protein*                 |
| PB000253.02.0 | PF11_0069   | hypothetical protein                  |
| PB000248.02.0 | PFL0795c    | hypothetical protein*                 |
| PB000198.00.0 | PF07_0089   | hypothetical protein                  |
| PB000066.01.0 | PF14_0159   | hypothetical protein*                 |
| PB000041.00.0 | PF10_0104   | hypothetical protein*                 |
| PB000652.03.0 | MAL13P1.203 | hypothetical protein                  |
| PB000562.02.0 | PF11_0262   | hypothetical protein*                 |
| PB000003.00.0 | MAL8P1.105  | hypothetical protein*                 |
| PB000317.00.0 | PF08_0008   | hypothetical protein*                 |
| PB106367.00.0 |             | hypothetical protein*                 |
| PB402566.00.0 | PFA0585w    | hypothetical protein*                 |
| PB402439.00.0 |             | hypothetical protein*                 |
| PB300655.00.0 | PF14_0117   | hypothetical protein                  |
| PB001312.02.0 | PF14_0510   | hypothetical protein                  |
| PB000924.02.0 | PFL1835w    | hypothetical protein*                 |
| PB001440.02.0 | PF13_0134   | hypothetical protein*                 |
| PB001066.03.0 | PF11_0055   | hypothetical protein                  |
| PB000814.03.0 | PFI0205w    | hypothetical protein*                 |
| PB000792.02.0 | PFI0230c    | hypothetical protein*                 |



|               |             |                                                          |
|---------------|-------------|----------------------------------------------------------|
| PB000622.01.0 | PF11_0046   | hypothetical protein*                                    |
| PB000616.00.0 | PFL2405c    | hypothetical protein                                     |
| PB000587.02.0 | PFL2135c    | hypothetical protein*                                    |
| PB000504.03.0 | PFE0680w    | hypothetical protein                                     |
| PB000393.03.0 | PFI0605c    | hypothetical protein*                                    |
| PB000642.01.0 | MAL13P1.237 | hypothetical protein                                     |
| PB107535.00.0 | PFI0610w    | hypothetical protein                                     |
| PB107035.00.0 |             | hypothetical protein                                     |
| PB101372.00.0 |             | hypothetical protein*                                    |
| PB000605.01.0 | PFF0860c    | hypothetical protein                                     |
| PB000002.03.0 | MAL13P1.336 | hypothetical protein                                     |
| PB403836.00.0 | PFB0161c    | hypothetical protein                                     |
| PB000623.02.0 | PFL1450c    | hypothetical protein                                     |
| PB001125.00.0 | PF08_0033   | hypothetical protein                                     |
| PB001586.02.0 | PF11_0374   | hypothetical protein                                     |
| PB001555.02.0 | PF13_0058   | hypothetical protein                                     |
| PB001186.00.0 | PFC0185w    | hypothetical protein                                     |
| PB001055.02.0 | PF11_0437   | hypothetical protein                                     |
| PB001051.02.0 | PF11_0440   | hypothetical protein                                     |
| PB000908.00.0 | PFI0770c    | hypothetical protein                                     |
| PB000870.02.0 | PFD1065c    | hypothetical protein*                                    |
| PB000862.00.0 | PF08_0074   | hypothetical protein                                     |
| PB000842.03.0 | PF14_0301   | hypothetical protein*                                    |
| PB000840.00.0 | MAL8P1.95   | hypothetical protein                                     |
| PB000801.02.0 | PF11_0485   | hypothetical protein*                                    |
| PB000768.03.0 | PF14_0717   | hypothetical protein                                     |
| PB000740.02.0 | PFI1455c    | hypothetical protein                                     |
| PB000737.02.0 | PFD0520c    | hypothetical protein                                     |
| PB000674.01.0 | PF13_0058   | hypothetical protein                                     |
| PB000672.02.0 | PF14_0228   | hypothetical protein*                                    |
| PB000508.03.0 | PF08_0119   | hypothetical protein                                     |
| PB000481.03.0 | PF13_0225   | hypothetical protein*                                    |
| PB000419.00.0 | PFF0325c    | hypothetical protein*                                    |
| PB000418.03.0 | PFI0945w    | hypothetical protein                                     |
| PB000314.02.0 | PFI0460w    | hypothetical protein                                     |
| PB000214.02.0 | PFI0705w    | hypothetical protein                                     |
| PB000190.00.0 | PFB0640c    | hypothetical protein                                     |
| PB000124.02.0 | PFL1660c    | hypothetical protein*                                    |
| PB000120.01.0 | PFC1065w    | hypothetical protein                                     |
| PB000034.01.0 | PF11_0325   | hypothetical protein                                     |
| PB000011.03.0 | MAL7P1.119  | hypothetical protein                                     |
| PB404179.00.0 |             | hypothetical protein*                                    |
| PB000828.02.0 | PFL1660c    | hypothetical protein*                                    |
| PB000801.03.0 | PF07_0014   | hypothetical protein*                                    |
| PB000592.02.0 | PF14_0329   | hypothetical protein                                     |
| PB000536.02.0 | PFA0420w    | hypothetical protein*                                    |
| PB000140.01.0 | PF11_0207   | hypothetical protein                                     |
| PB000898.02.0 | PFI0855w    | hypothetical protein                                     |
| PB000553.03.0 | PF13_0161   | hypothetical protein                                     |
| PB000372.02.0 | PF08_0030   | hypothetical protein                                     |
| PB000221.03.0 | PF08_0075   | 60S ribosomal protein L13                                |
| PB001359.02.0 | PF14_0448   | ribosomal protein S2                                     |
| PB000776.00.0 | PF14_0104   | eukaryotic translation initiation factor 2 gamma subunit |
| PB000669.01.0 | PFL0460w    | u6 snRNA-associated Sm-like protein                      |
| PB000541.02.0 | PFE0350c    | 60S ribosomal subunit protein L4/L1                      |
| PB000219.02.0 | PF11_0171   | RNA binding protein*                                     |

|               |            |                                                  |
|---------------|------------|--------------------------------------------------|
| PB000417.00.0 | PF10_0272  | ribosomal protein L3                             |
| PB000920.03.0 | PF11_0065  | ribosomal protein S4                             |
| PB000686.02.0 | PF13_0213  | 60S ribosomal subunit protein L6e                |
| PB000636.03.0 | PF14_0230  | ribosomal protein family L5                      |
| PB000511.03.0 | PFE0975c   | 40S ribosomal subunit protein S24                |
| PB000282.02.0 | PF14_0296  | ribosomal protein L14                            |
| PB000275.02.0 | PF11_0106  | 60S ribosomal protein L36                        |
| PB000265.03.0 | PF14_0205  | ribosomal protein S25                            |
| PB001103.02.0 | PF14_0391  | ribosomal protein L1                             |
| PB000169.03.0 | PF13_0224  | 60S ribosomal subunit protein L18                |
| PB001583.02.0 | PF13_0262  | lysine-tRNA ligase                               |
| PB001285.00.0 | PF14_0096  | ribonucleoprotein homolog F21B7.26               |
| PB001286.00.0 | PFL1170w   | polyadenylate-binding protein                    |
| PB001002.03.0 | PF14_0241  | basic transcription factor 3b                    |
| PB000296.01.0 | PF11_0266  | small nuclear ribonucleoprotein D1               |
| PB000119.00.0 | PFE0870w   | transcriptional regulator*                       |
| PB000533.00.0 | PF13_0346  | ubiquitin/ribosomal fusion protein uba52         |
| PB001107.01.0 | PFE0845c   | 60S ribosomal protein L8                         |
| PB000603.01.0 | PFC0915w   | ATP-dependent RNA Helicase                       |
| PB001643.02.0 | PFC1020c   | 40S ribosomal protein S3A                        |
| PB001521.02.0 | PF13_0268  | ribosomal protein L17                            |
| PB001366.02.0 | MAL8P1.83  | eukaryotic translation initiation factor         |
| PB001184.00.0 | PFC0290w   | 40S ribosomal protein S23                        |
| PB001182.00.0 | PFC0300c   | 60S ribosomal protein L7                         |
| PB001087.02.0 | MAL13P1.92 | 40S ribosomal protein S15                        |
| PB001076.01.0 | PF10_0103  | eukaryotic translation initiation factor 2, beta |
| PB001067.00.0 | PFE1005w   | 40S ribosomal subunit protein S9                 |
| PB001054.02.0 | PF11_0438  | ribosomal protein                                |
| PB000999.03.0 | PFB0830w   | ribosomal protein S26e                           |
| PB000998.02.0 | PFD1055w   | ribosomal protein S19s                           |
| PB000967.01.0 | PFF0885w   | 60S ribosomal protein L27a                       |
| PB000958.03.0 | PFC0870w   | elongation factor 1 (EF-1)                       |
| PB000942.03.0 | PF13_0228  | 40S ribosomal subunit protein S6                 |
| PB000918.01.0 | PF11_0043  | 60S acidic ribosomal protein p1                  |
| PB000822.02.0 | PF14_0627  | ribosomal protein S3                             |
| PB000761.03.0 | PF14_0141  | ribosomal protein L10                            |
| PB000672.01.0 | PFF0700c   | 60S ribosomal protein L19                        |
| PB000560.01.0 | PF11_0272  | ribosomal protein S18                            |
| PB000550.03.0 | PFL2095w   | translation initiation factor SUI1               |
| PB000523.01.0 | PFC0400w   | 60S Acidic ribosomal protein P2                  |
| PB000465.03.0 | PFL0210c   | eukaryotic initiation factor 5a                  |
| PB000391.01.0 | PF11_0313  | ribosomal phosphoprotein P0                      |
| PB000272.01.0 | PFD0770c   | ribosomal protein I15                            |
| PB000222.03.0 | PF08_0076  | 40S ribosomal protein S16                        |
| PB000194.03.0 | PF13_0049  | 60S ribosomal protein L24                        |
| PB000180.03.0 | PF13_0014  | 40S ribosomal protein S7 homologue               |
| PB000178.02.0 | PFE0810c   | 40S ribosomal subunit protein S14                |
| PB000126.03.0 | PF14_0655  | RNA helicase-1                                   |
| PB000148.02.0 | PF10_0187  | ribosomal protein L30e                           |
| PB000414.01.0 | PFE0160c   | Ser/Arg-rich splicing factor                     |
| PB000088.03.0 | PF11_0293  | multiprotein bridging factor type 1              |
| PB104904.00.0 | PF13_0171  | 60S ribosomal protein L23                        |
| PB001324.02.0 | PF14_0579  | ribosomal protein L27                            |
| PB001143.02.0 | PF14_0083  | ribosomal protein                                |
| PB001042.03.0 | PFI0190w   | ribosomal protein L32                            |
| PB000800.00.0 | PF14_0486  | elongation factor 2                              |

|               |             |                                         |
|---------------|-------------|-----------------------------------------|
| PB000782.02.0 | PFB0545c    | ribosomal protein L7/L12*               |
| PB000676.03.0 | PF13_0316   | 40S ribosomal protein S13               |
| PB000510.00.0 | MAL13P1.209 | 60S ribosomal subunit porotein L18      |
| PB000393.01.0 | PF11_0312   | ribosomal protein L38e                  |
| PB000367.02.0 | PFE0185c    | 60S ribosomal subunit protein L31       |
| PB000303.03.0 | PFL2055w    | 40S ribosomal protein S17               |
| PB000172.01.0 | PFI1475w    | merozoite surface protein 1             |
| PB000173.03.0 | PFE0120c    | merozoite surface protein 8*            |
| PB000442.03.0 | PF13_0197   | merozoite surface protein 7*            |
| PB000668.01.0 | PFL1385c    | merozoite surface protein 9*            |
| CAD12774.1    | PFB0120w    | Small exported protein 3*               |
| PB301475.00.0 | PFE0075c    | rhostry-associated protein*             |
| PB103628.00.0 | MAL7P1.208  | rhostry associated membrane antigen*    |
| PB001562.02.0 | PFI1445w    | RhopH2*                                 |
| PB000779.00.0 | PF14_0102   | rhostry-associated protein 1            |
| PB000405.02.0 | PFC0110w    | CLAG*                                   |
| PB300291.00.0 | PFI0265c    | high molecular weight rhostry protein 3 |
| PB000821.01.0 | PF11_0344   | apical membrane antigen-1*              |
| PB100384.00.0 | PFB0120w    | small exported protein 1                |

| <b>MIPs function</b>         | <b>Peptide count</b> | <b>Spectrum count</b> | <b>Sequence coverage</b> | <b>Predicted localisation</b> |
|------------------------------|----------------------|-----------------------|--------------------------|-------------------------------|
| micronemal protein           | 44                   | 196                   | 44                       | Sec                           |
| micronemal protein           | 61                   | 1094                  | 68.9                     | Sec/Api                       |
| micronemal protein           | 60                   | 168                   | 27                       | Sec/Api                       |
| micronemal protein           | 8                    | 29                    | 30.2                     | Sec                           |
| micronemal protein           | 12                   | 43                    | 34                       | Sec                           |
| micronemal protein           | 13                   | 29                    | 16.9                     | Sec/Api                       |
| micronemal protein           | 59                   | 438                   | 58.9                     | Sec                           |
| apical oranelles and surface | 3                    | 4                     | 5.7                      | Sec                           |
| apical oranelles and surface | 2                    | 2                     | 6.3                      | Sec                           |
| apical oranelles and surface | 13                   | 24                    | 36.2                     | Sec                           |
| apical oranelles and surface | 9                    | 21                    | 38.1                     | Sec                           |
| apical oranelles and surface | 6                    | 12                    | 21                       | Sec                           |
| apical oranelles and surface | 15                   | 18                    | 15.2                     | Sec                           |
| apical oranelles and surface | 8                    | 34                    | 16.8                     | Sec                           |
| apical oranelles and surface | 2                    | 3                     | 30.6                     | Sec                           |
| apical oranelles and surface | 2                    | 3                     | 2                        | Sec                           |
| apical oranelles and surface | 12                   | 52                    | 67.2                     | Sec                           |
| apical oranelles and surface | 2                    | 4                     | 4.5                      | Sec                           |
| apical oranelles and surface | 4                    | 5                     | 7.8                      | Sec                           |
| apical oranelles and surface | 7                    | 20                    | 17.5                     | Sec/Api                       |
| apical oranelles and surface | 15                   | 30                    | 13.5                     | Sec/Api                       |
| apical oranelles and surface | 5                    | 8                     | 5                        | Sec/Api                       |
| apical oranelles and surface | 12                   | 54                    | 40.5                     | Sec/Api                       |
| apical oranelles and surface | 6                    | 17                    | 39                       | C                             |
| apical oranelles and surface | 6                    | 17                    | 12.1                     | C                             |
| apical oranelles and surface | 7                    | 13                    | 13.5                     | C                             |
| apical oranelles and surface | 3                    | 3                     | 7                        | C                             |
| apical oranelles and surface | 3                    | 5                     | 4.2                      | C                             |
| apical oranelles and surface | 4                    | 7                     | 5.4                      | Mito                          |
| apical oranelles and surface | 13                   | 23                    | 13.5                     | Nuc/Mito                      |
| apical oranelles and surface | 9                    | 16                    | 13.5                     | Nuc                           |
| vesicle traffick             | 5                    | 7                     | 22                       | Sec                           |
| vesicle traffick             | 6                    | 10                    | 22.8                     | Sec                           |
| vesicle traffick             | 3                    | 7                     | 24                       | Sec                           |
| vesicle traffick             | 2                    | 2                     | 6.2                      | Sec                           |
| vesicle traffick             | 52                   | 175                   | 77.1                     | Sec                           |
| vesicle traffick             | 1                    | 18                    | 1800                     | Sec                           |
| vesicle traffick             | 10                   | 20                    | 13                       | Sec                           |
| vesicle traffick             | 3                    | 3                     | 8.6                      | Sec                           |
| vesicle traffick             | 5                    | 13                    | 7.5                      | Sec                           |
| vesicle traffick             | 3                    | 4                     | 3.2                      | Sec                           |
| vesicle traffick             | 3                    | 4                     | 15.1                     | Sec/Api                       |
| vesicle traffick             | 80                   | 585                   | 51.9                     | Sec/Api                       |
| vesicle traffick             | 3                    | 5                     | 4.7                      | C                             |
| vesicle traffick             | 3                    | 4                     | 16.4                     | C                             |
| vesicle traffick             | 2                    | 8                     | 10.9                     | C                             |

|                  |    |     |      |         |
|------------------|----|-----|------|---------|
| vesicle traffick | 3  | 3   | 9.1  | C       |
| vesicle traffick | 2  | 2   | 9.7  | C       |
| vesicle traffick | 4  | 6   | 9.5  | C       |
| vesicle traffick | 3  | 8   | 28.6 | C       |
| vesicle traffick | 2  | 2   | 7.4  | C       |
| vesicle traffick | 4  | 5   | 25.4 | C       |
| vesicle traffick | 4  | 5   | 21   | C       |
| vesicle traffick | 4  | 6   | 7.8  | Nuc/ER  |
| Signalling       | 8  | 14  | 10.2 | Sec     |
| Signalling       | 2  | 2   | 5.7  | Sec     |
| Signalling       | 3  | 4   | 17.8 | Sec     |
| Signalling       | 6  | 9   | 8.7  | Sec     |
| Signalling       | 3  | 3   | 5.8  | Sec     |
| Signalling       | 8  | 14  | 9.1  | Sec     |
| Signalling       | 2  | 3   | 4.7  | Sec/ER  |
| Signalling       | 8  | 47  | 18.5 | Sec/Api |
| Signalling       | 15 | 70  | 46.2 | C       |
| Signalling       | 2  | 5   | 3.5  | C       |
| Signalling       | 2  | 2   | 26.8 | C       |
| cytoskeleton     | 10 | 20  | 15.5 | Sec     |
| cytoskeleton     | 9  | 20  | 24.3 | C       |
| cytoskeleton     | 17 | 46  | 49   | C       |
| cytoskeleton     | 12 | 39  | 24.2 | C       |
| cytoskeleton     | 4  | 7   | 22.1 | C       |
| cytoskeleton     | 2  | 5   | 18   | C       |
| cytoskeleton     | 13 | 55  | 35   | C       |
| cytoskeleton     | 7  | 26  | 11.4 | C       |
| Chaperone        | 20 | 52  | 30.1 | Sec     |
| Chaperone        | 3  | 4   | 18.4 | Sec     |
| Chaperone        | 2  | 2   | 4.6  | Sec     |
| Chaperone        | 4  | 7   | 18.9 | Sec     |
| Chaperone        | 7  | 11  | 17.5 | Sec     |
| Chaperone        | 66 | 283 | 57.1 | Sec     |
| Chaperone        | 12 | 29  | 26.9 | Sec     |
| Chaperone        | 14 | 22  | 19.2 | Sec     |
| Chaperone        | 16 | 44  | 33.3 | Sec/Api |
| Chaperone        | 18 | 46  | 25.6 | Sec/Api |
| Chaperone        | 8  | 10  | 12.8 | Sec/Api |
| Chaperone        | 16 | 27  | 36.8 | Sec/Api |
| Chaperone        | 20 | 58  | 30.2 | C       |
| Chaperone        | 17 | 33  | 20.8 | C       |
| Chaperone        | 4  | 4   | 20.2 | C       |
| Chaperone        | 10 | 18  | 22.6 | C       |
| Chaperone        | 16 | 37  | 31.3 | C       |
| Chaperone        | 3  | 11  | 21.2 | C       |
| Chaperone        | 2  | 4   | 6.9  | C       |
| Chaperone        | 36 | 106 | 38   | C       |
| Chaperone        | 19 | 81  | 96.7 | C       |
| Chaperone        | 2  | 4   | 7    | C       |
| Chaperone        | 3  | 7   | 12   | Nuc     |
| metabolism       | 6  | 7   | 9.1  | Sec     |
| metabolism       | 9  | 15  | 12.3 | Sec     |
| metabolism       | 9  | 30  | 20.2 | Sec     |
| metabolism       | 2  | 2   | 5.1  | Sec     |
| metabolism       | 3  | 5   | 8.2  | Sec     |
| metabolism       | 13 | 26  | 23.6 | Sec     |

|                     |    |     |      |         |
|---------------------|----|-----|------|---------|
| metabolism          | 2  | 3   | 7.4  | Sec     |
| metabolism          | 4  | 8   | 9.2  | Sec     |
| metabolism          | 2  | 2   | 9.1  | Sec     |
| metabolism          | 3  | 9   | 12.1 | Sec     |
| metabolism          | 4  | 7   | 13   | Sec     |
| metabolism          | 5  | 14  | 30.9 | Sec     |
| metabolism          | 2  | 2   | 6.3  | Sec     |
| metabolism          | 6  | 8   | 9.4  | Sec     |
| metabolism          | 2  | 2   | 1.7  | Sec     |
| metabolism          | 3  | 4   | 43   | Sec     |
| metabolism          | 3  | 4   | 10.5 | Sec     |
| metabolism          | 18 | 53  | 31.5 | Sec/Api |
| metabolism          | 3  | 6   | 9.1  | Sec/Api |
| metabolism          | 20 | 42  | 17.4 | Sec/ER  |
| metabolism          | 3  | 5   | 1.7  | Sec/ER  |
| metabolism          | 9  | 29  | 21.7 | C       |
| metabolism          | 3  | 4   | 13.5 | C       |
| metabolism          | 12 | 33  | 35.6 | C       |
| metabolism          | 7  | 10  | 39.8 | C       |
| metabolism          | 2  | 2   | 6.4  | C       |
| metabolism          | 3  | 14  | 13   | C       |
| metabolism          | 8  | 14  | 19   | C       |
| metabolism          | 10 | 28  | 36.1 | C       |
| metabolism          | 8  | 12  | 20   | C       |
| metabolism          | 12 | 33  | 35.6 | C       |
| metabolism          | 14 | 52  | 59.1 | C       |
| metabolism          | 12 | 35  | 34   | Mito    |
| metabolism          | 2  | 3   | 6.8  | Mito    |
| metabolism          | 2  | 5   | 4.3  | Mito    |
| metabolism          | 3  | 4   | 10.9 | Mito    |
| metabolism          | 4  | 10  | 9.7  | Mito    |
| metabolism          | 5  | 11  | 10.5 | Mito    |
| nuclear/ cell cycle | 6  | 7   | 9.4  | Sec     |
| nuclear/ cell cycle | 2  | 4   | 37.9 | Sec     |
| nuclear/ cell cycle | 20 | 146 | 68.4 | C       |
| nuclear/ cell cycle | 10 | 21  | 13.5 | C       |
| nuclear/ cell cycle | 3  | 7   | 29.8 | C       |
| nuclear/ cell cycle | 3  | 5   | 15.5 | C       |
| nuclear/ cell cycle | 19 | 572 | 62.6 | C       |
| nuclear/ cell cycle | 11 | 242 | 34.2 | C       |
| nuclear/ cell cycle | 2  | 5   | 13.9 | C       |
| nuclear/ cell cycle | 3  | 3   | 10.7 | C       |
| nuclear/ cell cycle | 5  | 11  | 15.2 | C       |
| nuclear/ cell cycle | 5  | 8   | 14.6 | C       |
| nuclear/ cell cycle | 9  | 33  | 38.9 | Mito    |
| nuclear/ cell cycle | 2  | 3   | 3.4  | Mito    |
| nuclear/ cell cycle | 14 | 44  | 55.9 | Mito    |
| nuclear/ cell cycle | 27 | 379 | 75   | Mito    |
| nuclear/ cell cycle | 27 | 379 | 75.4 | Mito    |
| nuclear/ cell cycle | 3  | 5   | 32.3 | Mito    |
| Protein fate        | 3  | 3   | 4.3  | Sec     |
| Protein fate        | 4  | 4   | 4.9  | Sec     |
| Protein fate        | 2  | 2   | 2.2  | Sec     |
| Protein fate        | 2  | 3   | 5.4  | Sec     |
| Protein fate        | 15 | 83  | 65.4 | Sec/Api |
| Protein fate        | 15 | 210 | 25.5 | C       |

|              |    |     |      |         |
|--------------|----|-----|------|---------|
| Protein fate | 4  | 4   | 17   | C       |
| Protein fate | 2  | 2   | 7.4  | C       |
| unknown      | 2  | 2   | 11   | Sec     |
| unknown      | 3  | 7   | 12.6 | Sec     |
| unknown      | 5  | 7   | 7.8  | Sec     |
| unknown      | 22 | 47  | 20   | Sec     |
| unknown      | 3  | 19  | 25.2 | Sec     |
| unknown      | 3  | 3   | 2.8  | Sec     |
| unknown      | 7  | 26  | 17.4 | Sec     |
| unknown      | 5  | 8   | 22.7 | Sec     |
| unknown      | 3  | 3   | 19.1 | Sec     |
| unknown      | 4  | 6   | 25.7 | Sec     |
| unknown      | 2  | 2   | 4.3  | Sec     |
| unknown      | 2  | 2   | 4    | Sec     |
| unknown      | 2  | 4   | 3    | Sec     |
| unknown      | 54 | 434 | 23.4 | Sec     |
| unknown      | 8  | 11  | 25.7 | Sec     |
| unknown      | 5  | 8   | 29.3 | Sec     |
| unknown      | 20 | 88  | 30   | Sec     |
| unknown      | 2  | 2   | 8.4  | Sec     |
| unknown      | 3  | 5   | 27.6 | Sec     |
| unknown      | 2  | 7   | 30   | Sec     |
| unknown      | 10 | 35  | 18.7 | Sec     |
| unknown      | 9  | 72  | 11.8 | Sec     |
| unknown      | 8  | 19  | 49.5 | Sec     |
| unknown      | 2  | 2   | 14.9 | Sec     |
| unknown      | 2  | 2   | 14.6 | Sec     |
| unknown      | 11 | 21  | 28.4 | Sec     |
| unknown      | 3  | 4   | 2.4  | Sec     |
| unknown      | 2  | 2   | 5.9  | Sec     |
| unknown      | 5  | 19  | 21.8 | Sec     |
| unknown      | 4  | 7   | 13.8 | Sec     |
| unknown      | 6  | 11  | 14.2 | Sec     |
| unknown      | 2  | 3   | 15.3 | Sec     |
| unknown      | 11 | 13  | 31.5 | Sec     |
| unknown      | 2  | 5   | 22   | Sec     |
| unknown      | 3  | 6   | 14.4 | Sec     |
| unknown      | 3  | 11  | 15.9 | Sec     |
| unknown      | 17 | 37  | 57   | Sec     |
| unknown      | 28 | 96  | 33.7 | Sec     |
| unknown      | 3  | 4   | 5.9  | Sec     |
| unknown      | 3  | 3   | 22.8 | Sec     |
| unknown      | 31 | 99  | 59.7 | Sec     |
| unknown      | 3  | 6   | 13.1 | Sec     |
| unknown      | 3  | 5   | 5    | Sec     |
| unknown      | 14 | 78  | 63.8 | Sec/GPI |
| unknown      | 4  | 25  | 23.8 | Sec/Api |
| unknown      | 10 | 36  | 93.4 | Sec/Api |
| unknown      | 4  | 9   | 54   | Sec/Api |
| unknown      | 8  | 16  | 24.4 | Sec/Api |
| unknown      | 3  | 7   | 6.7  | Sec/Api |
| unknown      | 8  | 11  | 31.6 | Sec/Api |
| unknown      | 4  | 5   | 10.9 | Sec/Api |
| unknown      | 15 | 60  | 22.3 | Sec/Api |
| unknown      | 5  | 8   | 19.7 | Sec/Api |
| unknown      | 2  | 4   | 5.3  | Sec/Api |

|                      |    |    |      |          |
|----------------------|----|----|------|----------|
| unknown              | 3  | 3  | 17.9 | Sec/Api  |
| unknown              | 5  | 10 | 10.1 | Sec/Api  |
| unknown              | 3  | 8  | 7.3  | Sec/Api  |
| unknown              | 2  | 3  | 10.4 | Sec/Api  |
| unknown              | 2  | 2  | 8.3  | Sec/Api  |
| unknown              | 6  | 10 | 20.1 | C        |
| unknown              | 4  | 13 | 27   | C        |
| unknown              | 7  | 12 | 13.4 | C        |
| unknown              | 2  | 2  | 30.9 | C        |
| unknown              | 19 | 62 | 20   | C        |
| unknown              | 3  | 9  | 3.2  | C        |
| unknown              | 6  | 10 | 31   | C        |
| unknown              | 4  | 9  | 12.4 | C        |
| unknown              | 12 | 32 | 28.5 | C        |
| unknown              | 5  | 8  | 7.9  | C        |
| unknown              | 8  | 51 | 48   | C        |
| unknown              | 5  | 13 | 19.7 | C        |
| unknown              | 4  | 14 | 36.6 | C        |
| unknown              | 7  | 30 | 29   | C        |
| unknown              | 3  | 6  | 22.6 | C        |
| unknown              | 2  | 2  | 18.7 | C        |
| unknown              | 13 | 45 | 35.5 | C        |
| unknown              | 3  | 10 | 18.3 | C        |
| unknown              | 3  | 4  | 15   | C        |
| unknown              | 2  | 2  | 17.6 | C        |
| unknown              | 29 | 78 | 49.9 | C        |
| unknown              | 2  | 2  | 7.4  | C        |
| unknown              | 2  | 20 | 20.1 | C        |
| unknown              | 8  | 51 | 54.3 | C        |
| unknown              | 2  | 2  | 4.5  | C        |
| unknown              | 2  | 29 | 15.2 | C        |
| unknown              | 2  | 3  | 11   | C        |
| unknown              | 4  | 6  | 19.9 | C        |
| unknown              | 6  | 10 | 34.8 | C        |
| unknown              | 9  | 37 | 22.9 | C        |
| unknown              | 2  | 3  | 10.8 | C        |
| unknown              | 2  | 2  | 2.3  | C        |
| unknown              | 3  | 8  | 28.3 | C        |
| unknown              | 3  | 4  | 6    | C        |
| unknown              | 3  | 7  | 14.8 | C        |
| unknown              | 2  | 2  | 4    | Mito     |
| unknown              | 7  | 10 | 50   | Mito     |
| unknown              | 8  | 30 | 22.2 | Mito     |
| unknown              | 2  | 2  | 4.6  | Mito     |
| unknown              | 4  | 17 | 12.7 | Mito     |
| unknown              | 2  | 3  | 17.4 | Mito     |
| unknown              | 7  | 14 | 14.2 | Nuc/Mito |
| unknown              | 2  | 3  | 4.5  | Nuc      |
| unknown              | 33 | 98 | 24.8 | Nuc      |
| unknown              | 4  | 5  | 11.1 | Nuc/ER   |
| probable contaminant | 9  | 15 | 31.2 | Sec      |
| probable contaminant | 6  | 12 | 27.1 | Sec      |
| probable contaminant | 3  | 4  | 13.1 | Sec      |
| probable contaminant | 3  | 8  | 56.5 | Sec      |
| probable contaminant | 9  | 18 | 26   | Sec      |
| probable contaminant | 4  | 5  | 16.8 | Sec      |



|                      |    |    |      |         |
|----------------------|----|----|------|---------|
| probable contaminant | 7  | 15 | 13.2 | Sec     |
| probable contaminant | 3  | 3  | 12.3 | Sec     |
| probable contaminant | 8  | 18 | 38.8 | Sec     |
| probable contaminant | 5  | 10 | 22.8 | Sec     |
| probable contaminant | 4  | 19 | 21.8 | Sec     |
| probable contaminant | 6  | 11 | 44.1 | Sec     |
| probable contaminant | 11 | 54 | 38.5 | Sec/Api |
| probable contaminant | 9  | 23 | 32   | Sec/Api |
| probable contaminant | 4  | 11 | 6    | Sec/Api |
| probable contaminant | 6  | 9  | 27.3 | C       |
| probable contaminant | 2  | 2  | 6.4  | C       |
| probable contaminant | 3  | 6  | 5.3  | C       |
| probable contaminant | 6  | 27 | 8.2  | C       |
| probable contaminant | 4  | 5  | 18.8 | C       |
| probable contaminant | 2  | 7  | 17.9 | C       |
| probable contaminant | 2  | 2  | 3    | C       |
| probable contaminant | 4  | 24 | 33.8 | C       |
| probable contaminant | 5  | 8  | 19.1 | C       |
| probable contaminant | 8  | 20 | 16.1 | C       |
| probable contaminant | 6  | 29 | 22.6 | C       |
| probable contaminant | 3  | 10 | 12.1 | C       |
| probable contaminant | 4  | 7  | 18   | C       |
| probable contaminant | 3  | 7  | 14   | C       |
| probable contaminant | 2  | 6  | 10.2 | C       |
| probable contaminant | 3  | 16 | 11.8 | C       |
| probable contaminant | 3  | 7  | 9.5  | C       |
| probable contaminant | 5  | 11 | 33.7 | C       |
| probable contaminant | 5  | 17 | 31.5 | C       |
| probable contaminant | 4  | 29 | 22.4 | C       |
| probable contaminant | 5  | 20 | 25.4 | C       |
| probable contaminant | 3  | 17 | 20.9 | C       |
| probable contaminant | 4  | 7  | 28   | C       |
| probable contaminant | 16 | 63 | 36.1 | C       |
| probable contaminant | 11 | 19 | 63   | C       |
| probable contaminant | 8  | 36 | 43.1 | C       |
| probable contaminant | 5  | 19 | 27.9 | C       |
| probable contaminant | 7  | 19 | 20.2 | C       |
| probable contaminant | 5  | 11 | 49.4 | C       |
| probable contaminant | 2  | 2  | 21.7 | C       |
| probable contaminant | 9  | 20 | 73.9 | C       |
| probable contaminant | 5  | 10 | 35.4 | C       |
| probable contaminant | 10 | 21 | 27.7 | C       |
| probable contaminant | 2  | 5  | 10.5 | C       |
| probable contaminant | 10 | 35 | 51.4 | C       |
| probable contaminant | 4  | 5  | 21.8 | C       |
| probable contaminant | 6  | 18 | 12.9 | C       |
| probable contaminant | 18 | 56 | 64.7 | C       |
| probable contaminant | 7  | 20 | 19.8 | C/ER    |
| probable contaminant | 3  | 4  | 17.6 | Mito    |
| probable contaminant | 2  | 2  | 8.4  | Mito    |
| probable contaminant | 4  | 12 | 27.9 | Mito    |
| probable contaminant | 3  | 8  | 24.5 | Mito    |
| probable contaminant | 8  | 26 | 43.6 | Mito    |
| probable contaminant | 10 | 23 | 51.2 | Mito    |
| probable contaminant | 3  | 6  | 18.3 | Mito    |
| probable contaminant | 15 | 48 | 17.5 | Mito    |

|                                   |    |     |      |         |
|-----------------------------------|----|-----|------|---------|
| probable contaminant              | 2  | 5   | 6.8  | Mito    |
| probable contaminant              | 5  | 10  | 33.3 | Mito    |
| probable contaminant              | 4  | 9   | 20.5 | Mito    |
| probable contaminant              | 4  | 9   | 42.5 | Mito    |
| probable contaminant              | 3  | 7   | 29.6 | Mito    |
| probable contaminant              | 4  | 9   | 33.6 | Mito    |
| probable BS contaminant           | 50 | 120 | 27.9 | Sec     |
| probable BS contaminant           | 14 | 50  | 29.2 | Sec     |
| probable BS contaminant           | 2  | 6   | 24.6 | Sec     |
| probable BS contaminant           | 3  | 4   | 30.3 | Sec     |
| probable BS contaminant           | 6  | 15  | 33.8 | Sec     |
| probable BS contaminant           | 3  | 6   | 12.5 | Sec/Api |
| probable BS contaminant           | 2  | 3   | 11.5 | Sec     |
| probable BS contaminant           | 7  | 16  | 7.9  | Sec     |
| probable BS contaminant           | 2  | 3   | 9.9  | Sec     |
| probable BS contaminant           | 4  | 5   | 5.7  | Sec     |
| BS contamination confirmed by IFA | 5  | 8   | 26.6 | Sec     |
| BS contamination confirmed by IFA | 4  | 8   | 11   | Sec     |
| BS contamination confirmed by IFA | 2  | 14  | 20.9 | Sec/Api |

Type of file: table

Label: suptable3

Filename: sm004.xls

**Supplementary Table 3. Spectral counts of rhoptry proteins detected in the *P. berghei* ookinete m**

| <b>Protein</b>                      |        | <b>microneme proteome</b> | <b>whole cell proteome</b> |
|-------------------------------------|--------|---------------------------|----------------------------|
| Rhoptry associated protein 1        | RAP1   | 4                         | 63                         |
| Rhoptry associated protein 2/ 3     | RAP2/3 | 6                         | 90                         |
| Rhoptry associated membrane antigen | RAMA   | 2                         | 0                          |
| High molecular mass complex H1      | RhopH1 | 4                         | 63                         |
| High molecular mass complex H2      | RhopH2 | 14                        | 159                        |
| High molecular mass complex H3      | RhopH3 | 7                         | 57                         |

**icroneme and mixed Asexual Blood Stage proteomes.**
