# Supplementary material
Source: PubMed Central journal article supplement (PMC2706521)
Supplement: NIHMS110679-supplement-method.pdf [file NIHMS110679-supplement-method.pdf]

# PROTEOMICS

## Supporting Information for Proteomics

**DOI 10.1002/pmic.200800404**

Kalpana Lal, Judith Helena Prieto, Elizabeth Bromley, Sanya J. Sanderson,  
John R. Yates III, Jonathan M. Wastling, Fiona M. Tomley and Robert E. Sinden

**Characterisation of *Plasmodium* invasive organelles an ookinete  
microneme proteome**
